# Supplementary material for: The role of acetyl-coA carboxylase2 in head and neck squamous cell carcinoma
Source: PeerJ journal article supplement (doi:10.7717/peerj.7037), 2019-06-11
Supplement: Numerical_data-2.zip [file Numerical_data-2.zip]

## Sheet: Sheet1
								p-ACC in HNSCC
								AT	LC
								35.4	91.23
								33.14	90.64
								30.12	86.79
								29.88	93.14
								34.29	88.11
								30.59	94
								28.11	88.77
								26.78	89.99
								26.64	86.99
								27.79	90.01
								29.72	92.27
								31.19	93.17
								33.32	89.93
								32.98	85.62
								25	90.17
								25.69	94.04
								34.12	86.19
								31.12	87.27
